# Supplementary material for: Cytomegalovirus vaccine vector-induced effector memory CD4 + T cells protect cynomolgus macaques from lethal aerosolized heterologous avian influenza challenge
Source: PubMed Central journal article supplement (PMC11272155; doi:10.1038/s41467-024-50345-6), 2024-07-19
Supplement: 41467_2024_50345_MOESM3_ESM.pdf [file 41467_2024_50345_MOESM3_ESM.pdf]

## **Description of Additional Supplementary Files**

**File Name: Supplementary Data 1**

**Description:** List of genes with fold change from the dd CyCMV/SIV IL-15 protection signature shown in Figure 3B.
